# Supplementary material for: A Systematic Review and Meta-Analysis of Immunoglobulin G Abnormalities and the Therapeutic Use of Intravenous Immunoglobulins (IVIG) in Autism Spectrum Disorder
Source: MDPI journal article supplement (doi:10.3390/jpm11060488), 2021-05-30
Supplement: s1 [file s1]

**Supplementary Table 2. Number of Participants for Meta-analysis of studies on immunoglobulin G Concentration in Autism Spectrum Disorder.**

|           | Non-Siblings |          | Siblings |          | All Controls |          |
|-----------|--------------|----------|----------|----------|--------------|----------|
|           | ASD          | Controls | ASD      | Controls | ASD          | Controls |
| Total IgG | 158          | 132      | 65       | 43       | 223          | 175      |
| IgG1      | 132          | 118      | 65       | 43       | 197          | 161      |
| IgG2      | 132          | 118      | 65       | 43       | 197          | 161      |
| IgG3      | 132          | 118      | 65       | 43       | 197          | 161      |
| IgG4      | 132          | 118      | 65       | 43       | 197          | 161      |
